# Supplementary material for: Spectroscopic evidence for a gas-phase librating G-quartet–Na+ complex
Source: Royal Society of Chemistry journal article supplement (doi:10.1039/c4cc05149a), 2014-01-01

# Supporting Material

## Spectroscopic evidence for a gas-phase librating G-quartet/ $\text{Na}^+$ complex

C. Fraschetti<sup>\*a</sup>, M. Montagna<sup>a</sup>, L. Guarcini<sup>a</sup>, L. Guidoni<sup>b</sup>, A. Filippi<sup>a</sup>

**Figure S1.** Calculated structures for the  $\text{Na}^+$ - $\text{G}_2$  dimer. In brackets the relative enthalpies in  $\text{kcal mol}^{-1}$  are reported.

**Table S1.** Description of calculated frequency of 2 b-d structures.

**Figure S2.** Calculated structures, energies (in  $\text{kcal mol}^{-1}$ ), and spectra of Watson-Crick type  $\text{Na}^+$ - $\text{G}_4$  quartet. The  $\Delta G$  values are compared with the  $\text{S}_4$  global minimum (B3LYP/6-31G(d,p)).

**Figure S3.** Calculated structures for the Hoogsteen-type  $\text{Na}^+$ - $\text{G}_4$  adduct. In the brackets the relative free energies in  $\text{kcal mol}^{-1}$  are reported ((B3LYP/6-311G(d,p))).

**Figure S4.** Free energy of  $\text{Na}^+$ - $\text{G}_4$  adduct along  $\phi$  dihedral angle during the 17 ps AIMD simulation.

**Figure S5.** a) Spectrum extracted from the AIMD simulation. b) Calculated spectra of  $\text{S}_4$  and c)  $\text{C}_{4h}$  structures. (B3LYP/6-311G(d,p))

**Figure S6.** Contributions of the different stretching modes to the calculated IR spectrum.

**Figure S1**

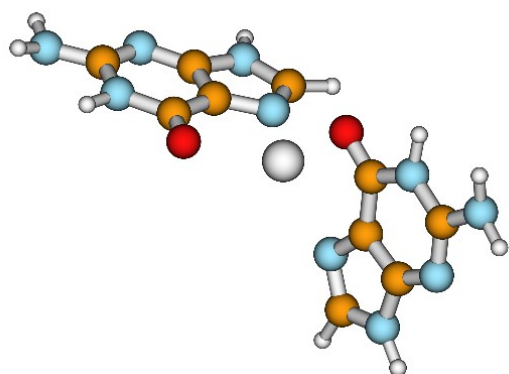

**2b (0.0)**

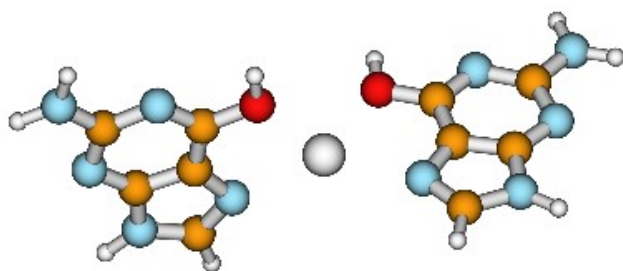

**2c (19.0)**

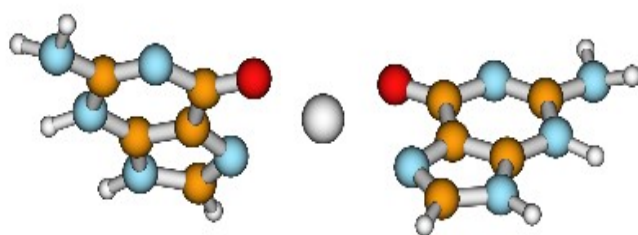

**2d (30.3)**

**Table S1**

| Stretching modes            | 2b   | 2c   | 2d   |
|-----------------------------|------|------|------|
| N1-H                        | 3413 |      |      |
| Symmetric N2H <sub>2</sub>  | 3436 | 3453 | 3413 |
| N3-H                        |      |      | 3444 |
| N9-H                        | 3468 | 3471 | 3470 |
| O6-H                        |      | 3568 |      |
| Asymmetric N2H <sub>2</sub> | 3555 | 3586 | 3529 |

Figure S2

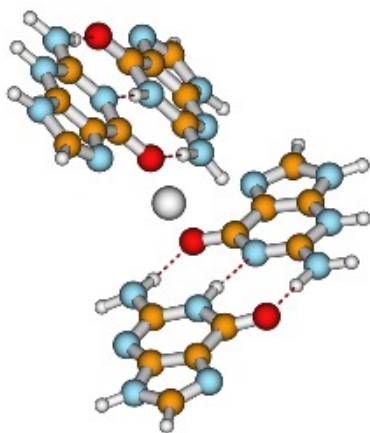

$$\Delta G = 59.4$$

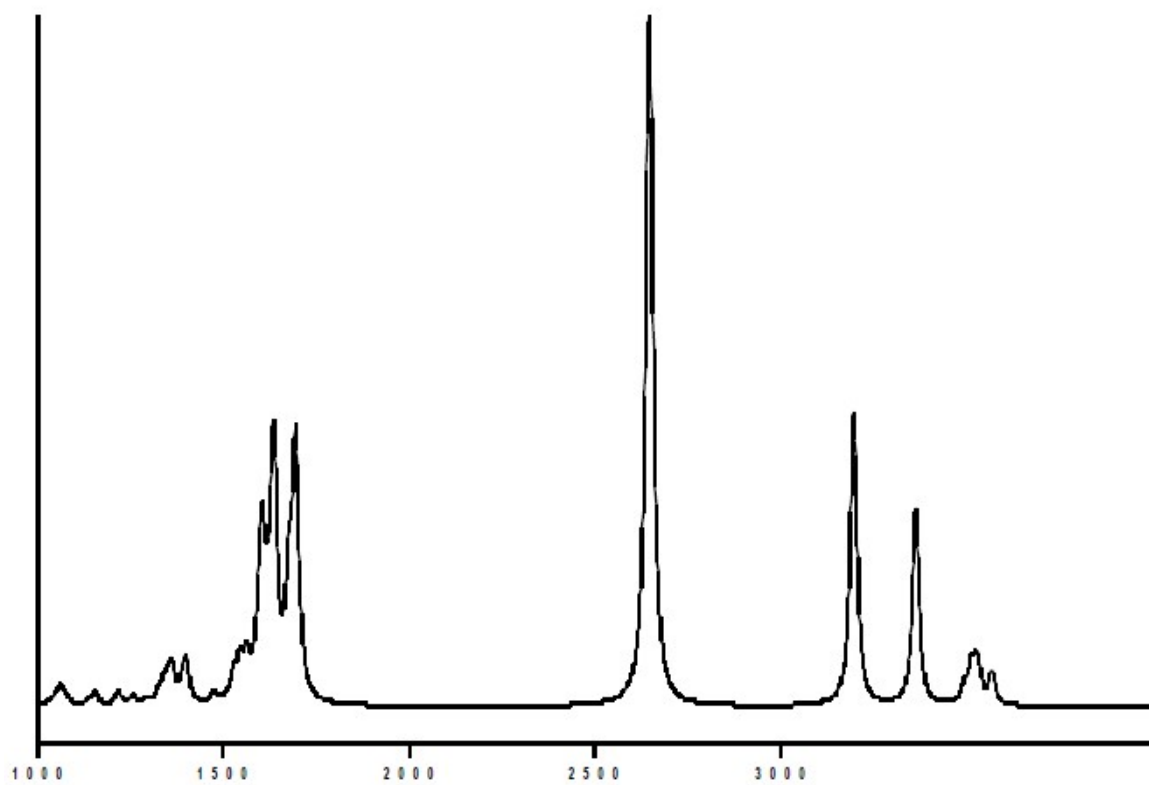

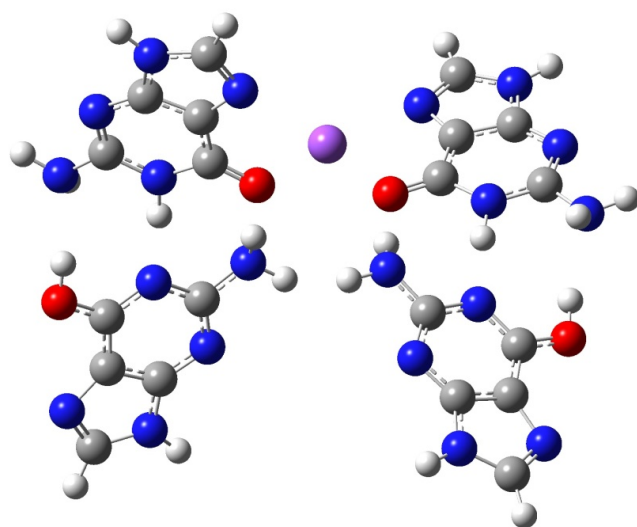

$\Delta G = 53.8$

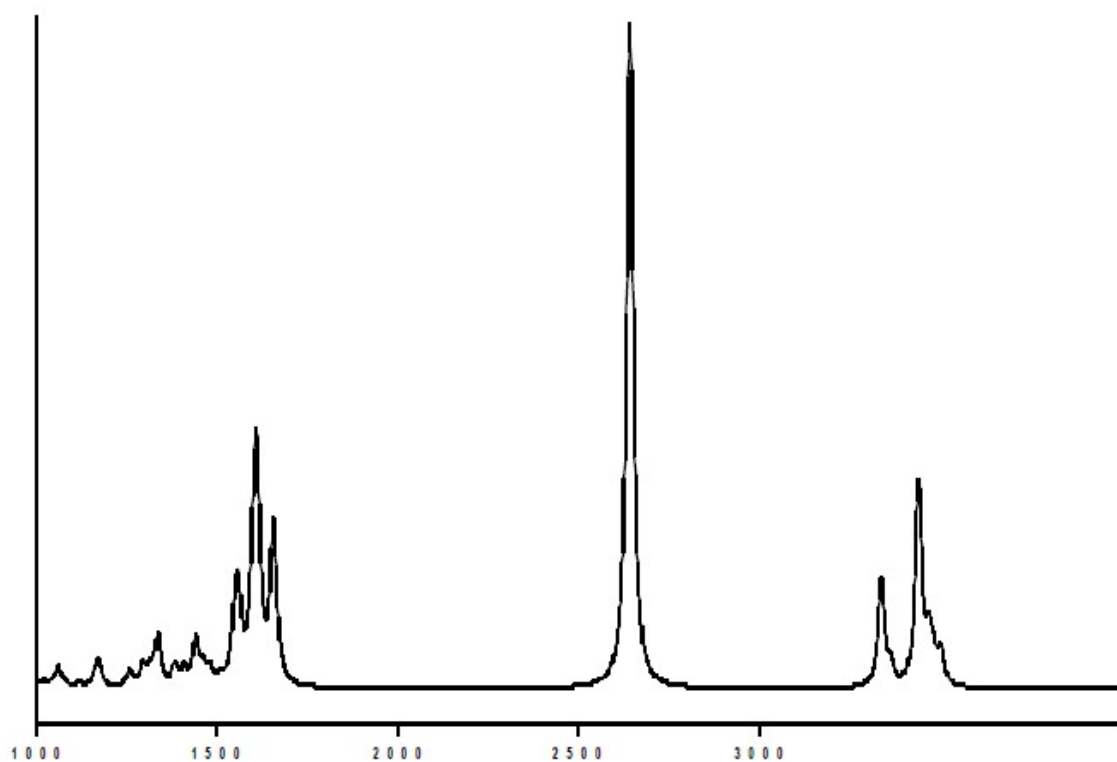

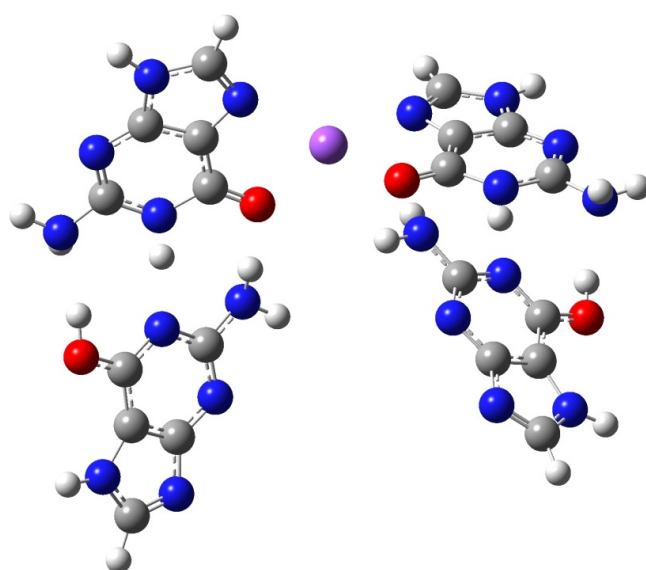

$$\Delta G = 60.2$$

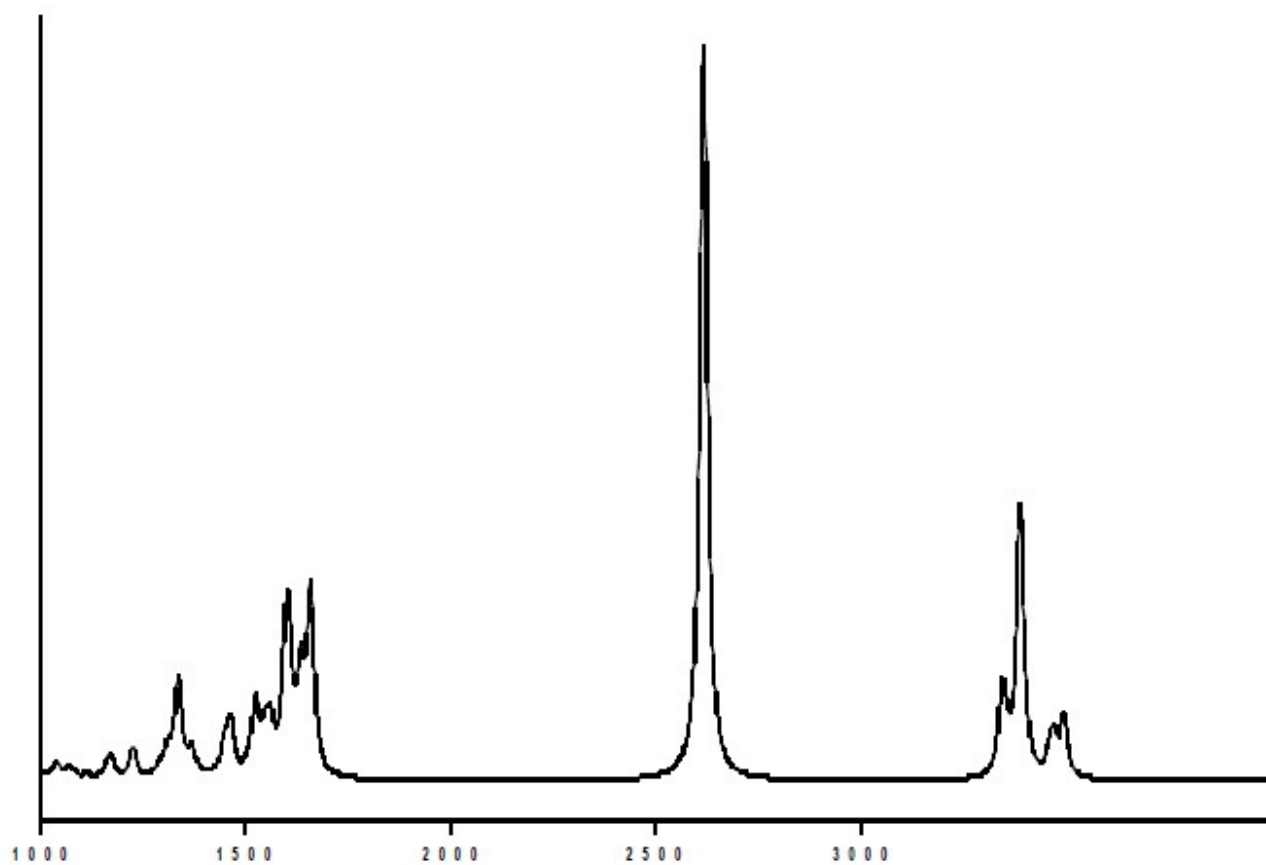

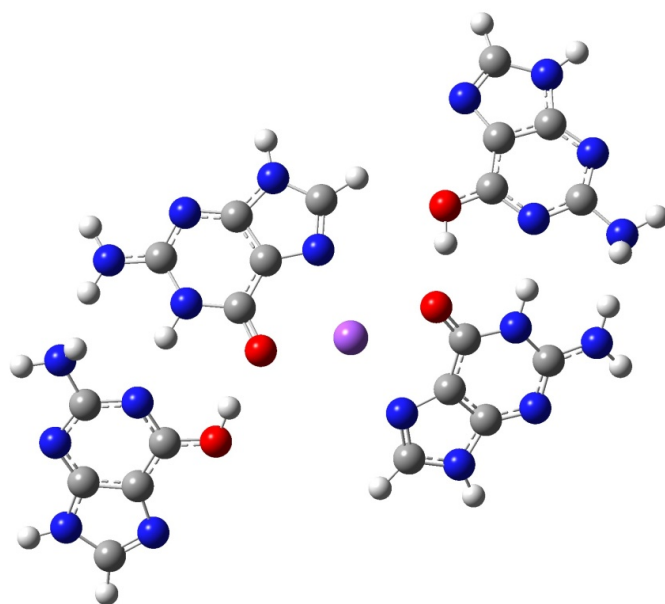

$$\Delta G = 39.8$$

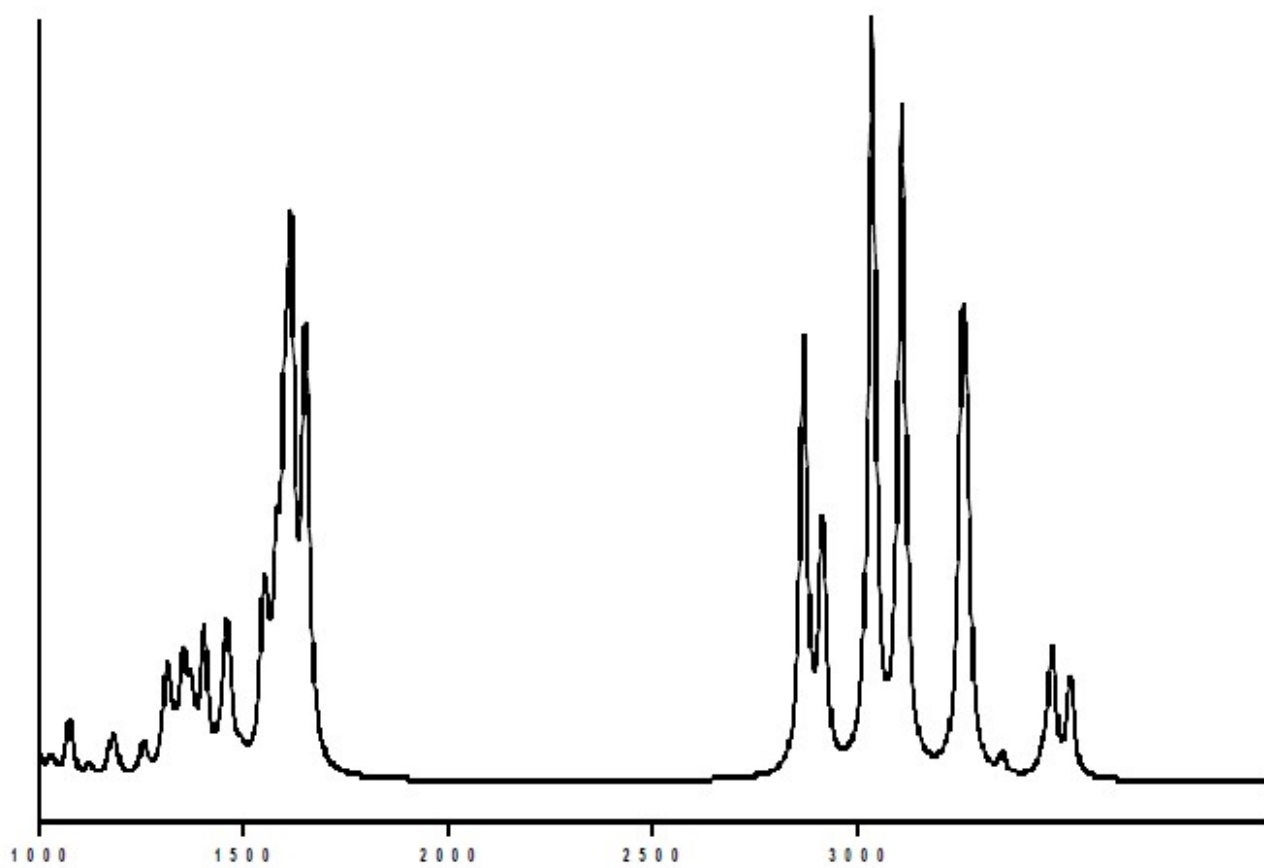

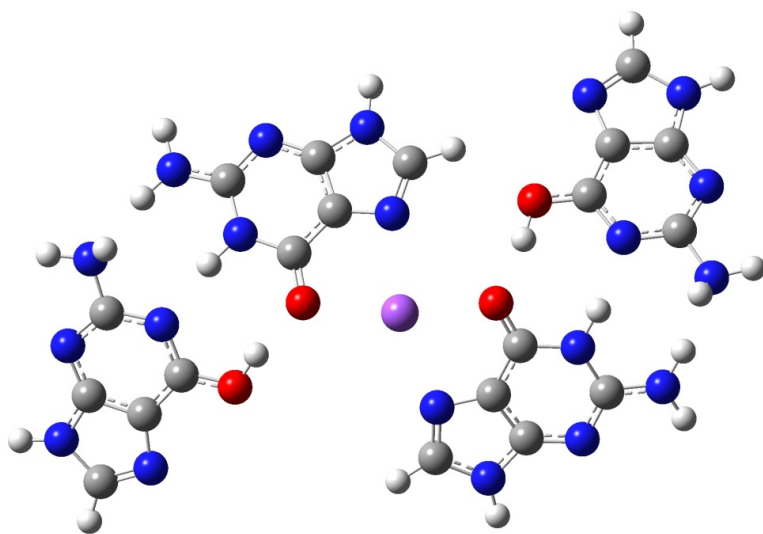

$\Delta G = 39.8$

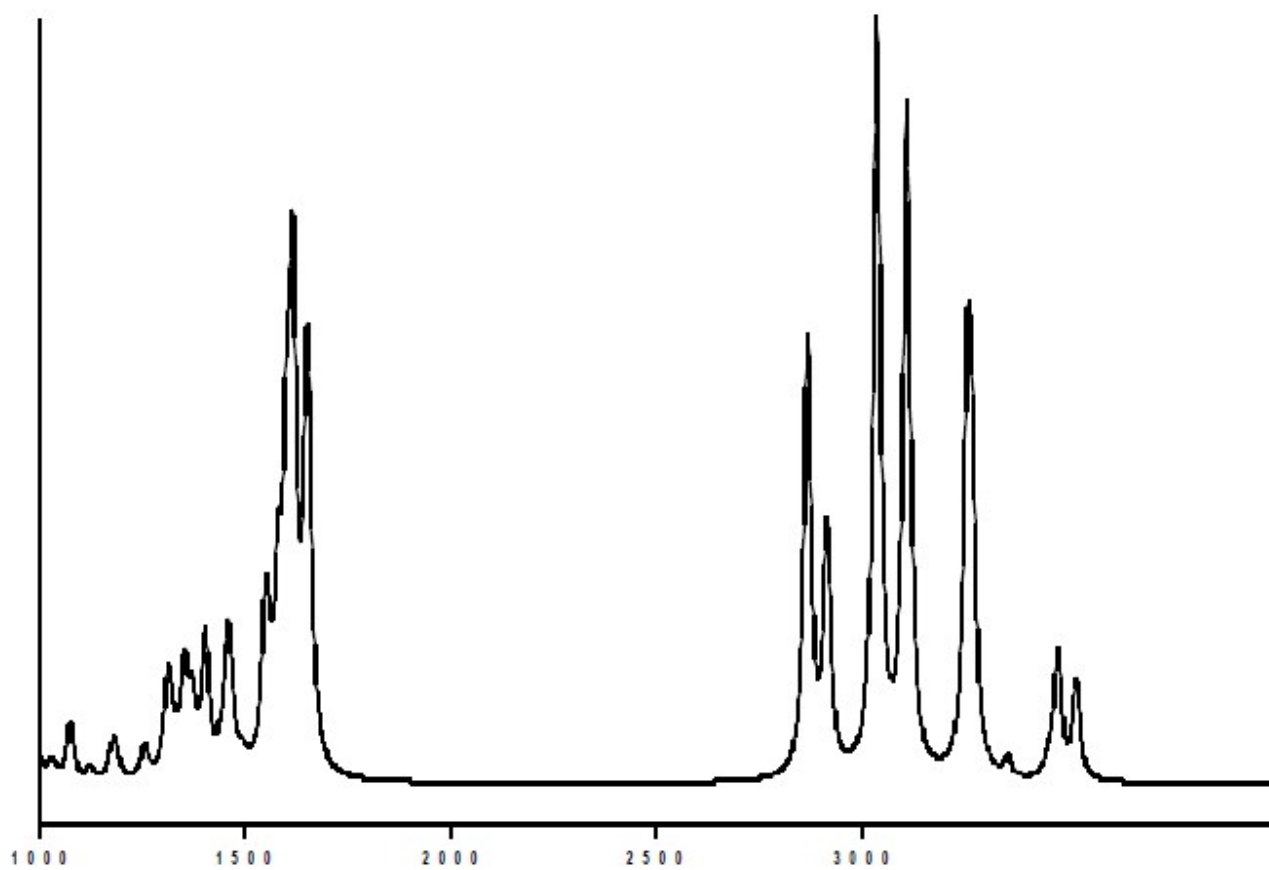



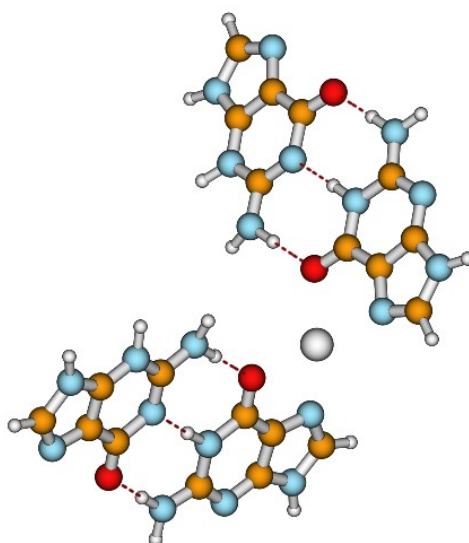

$$\Delta G = 51.6$$

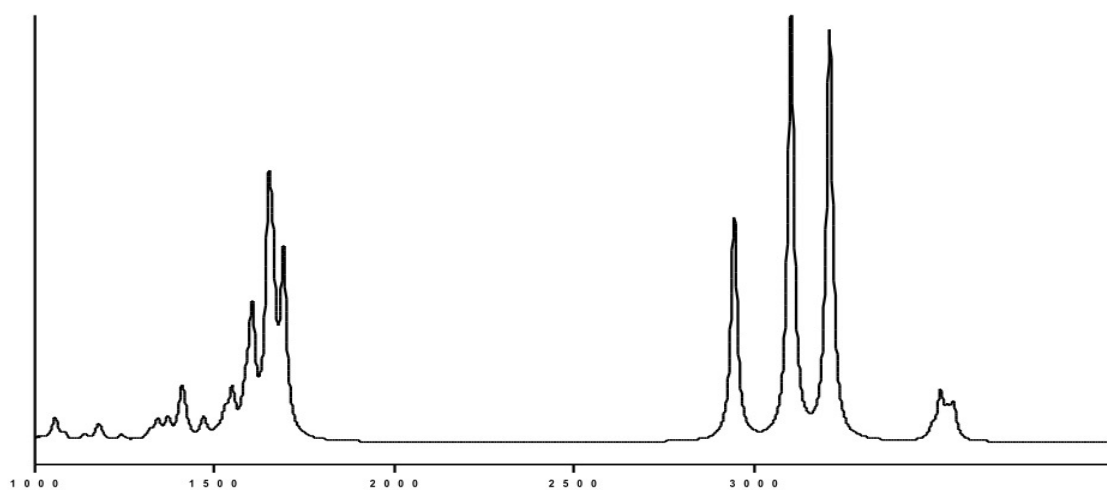

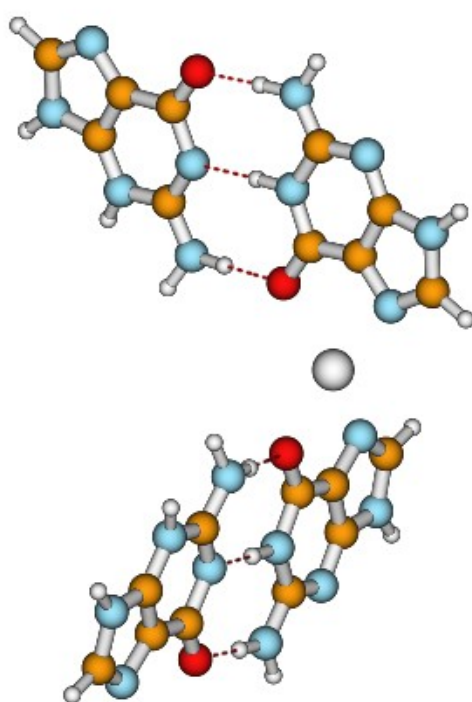

$$\Delta G = 51.8$$

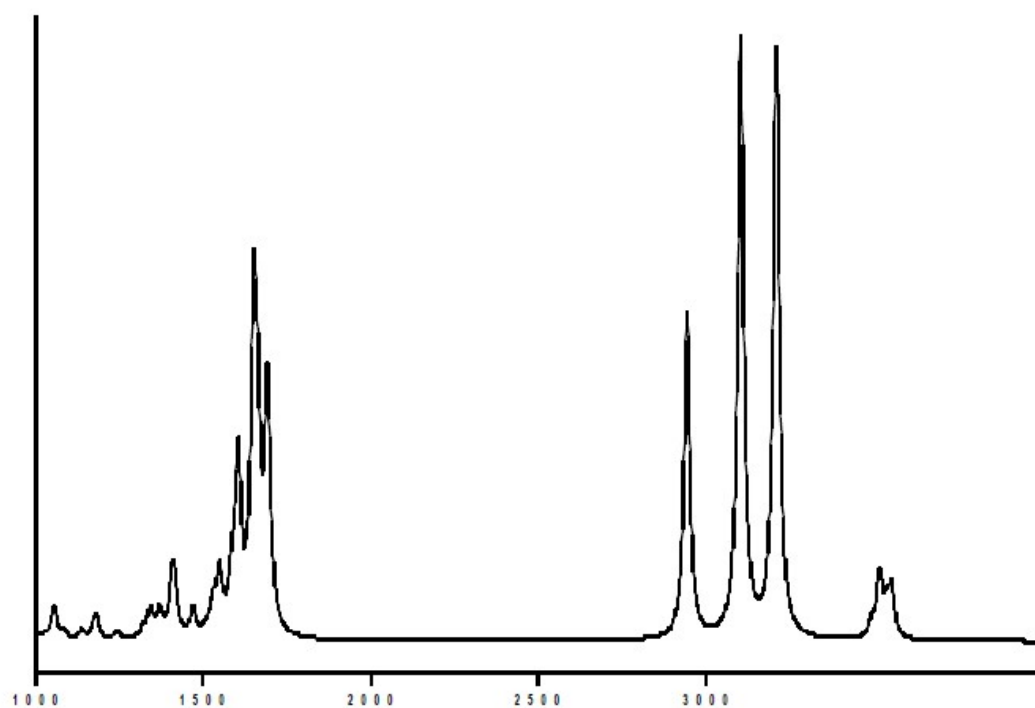

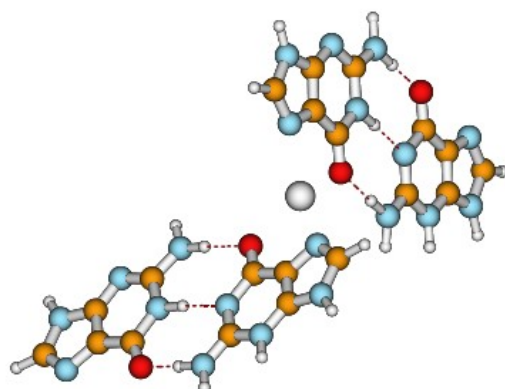

$\Delta G = 56.1$

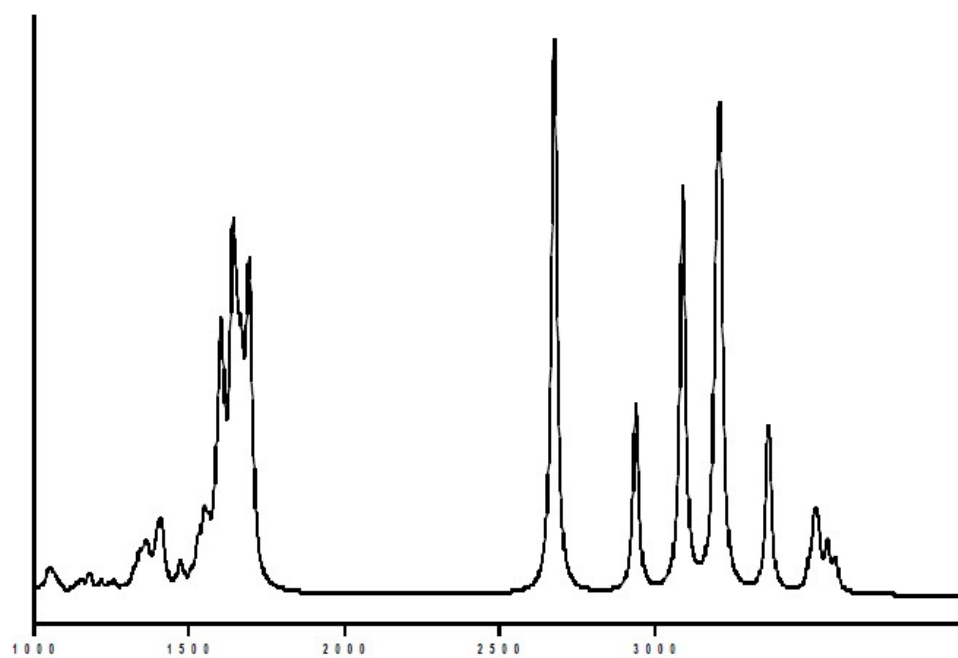

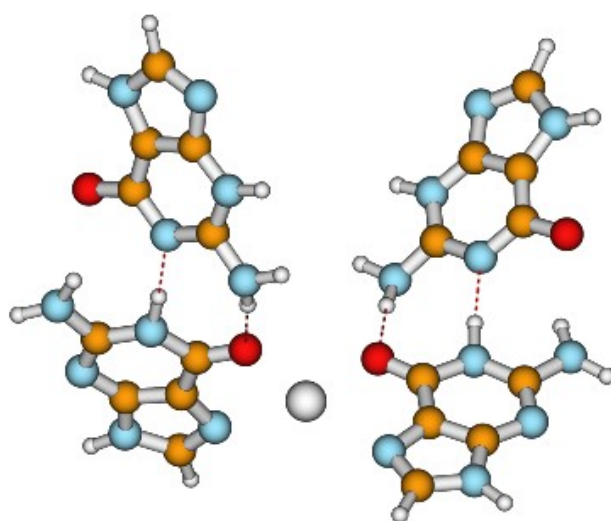

$$\Delta G = 28.0$$

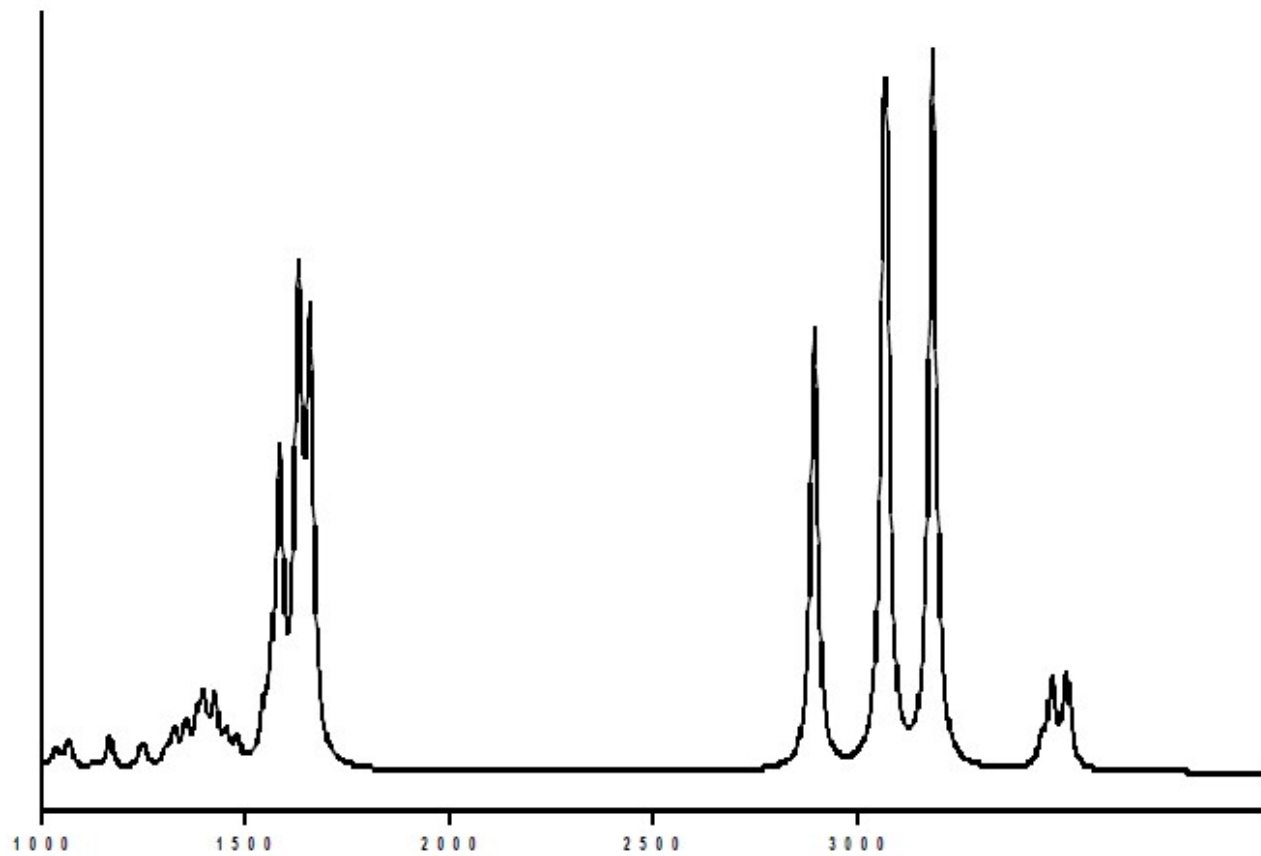

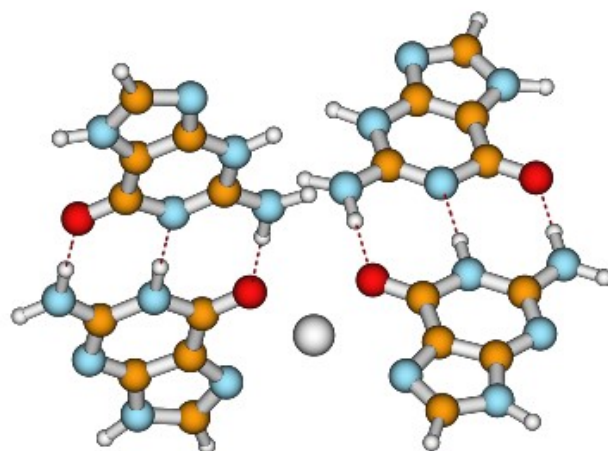

$\Delta G = 28.4$

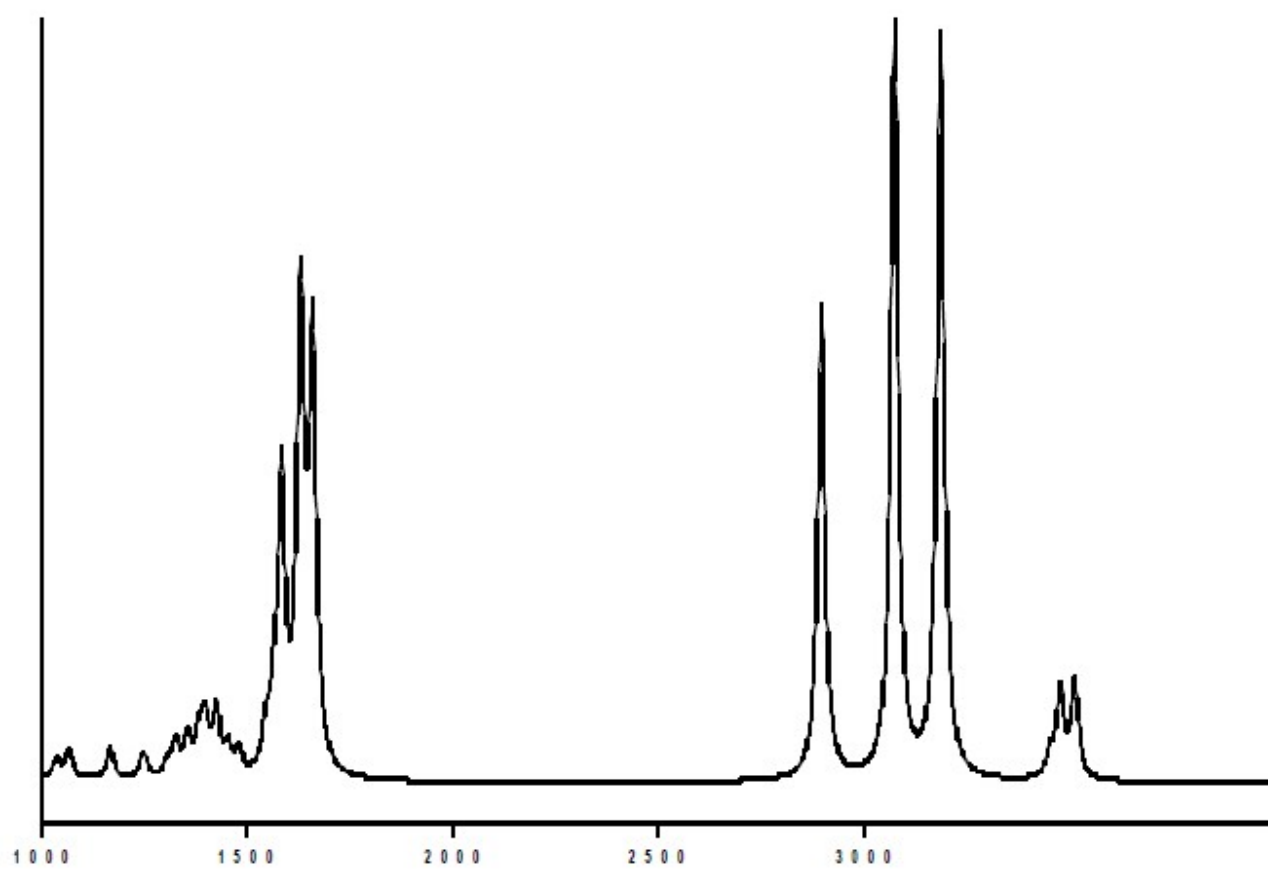

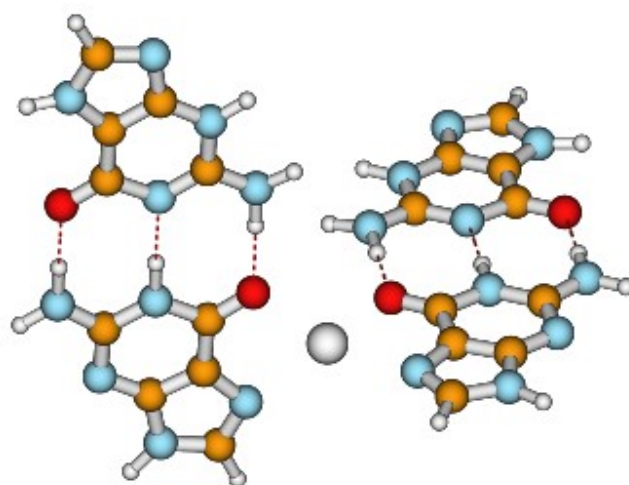

$$\Delta G = 28.3$$

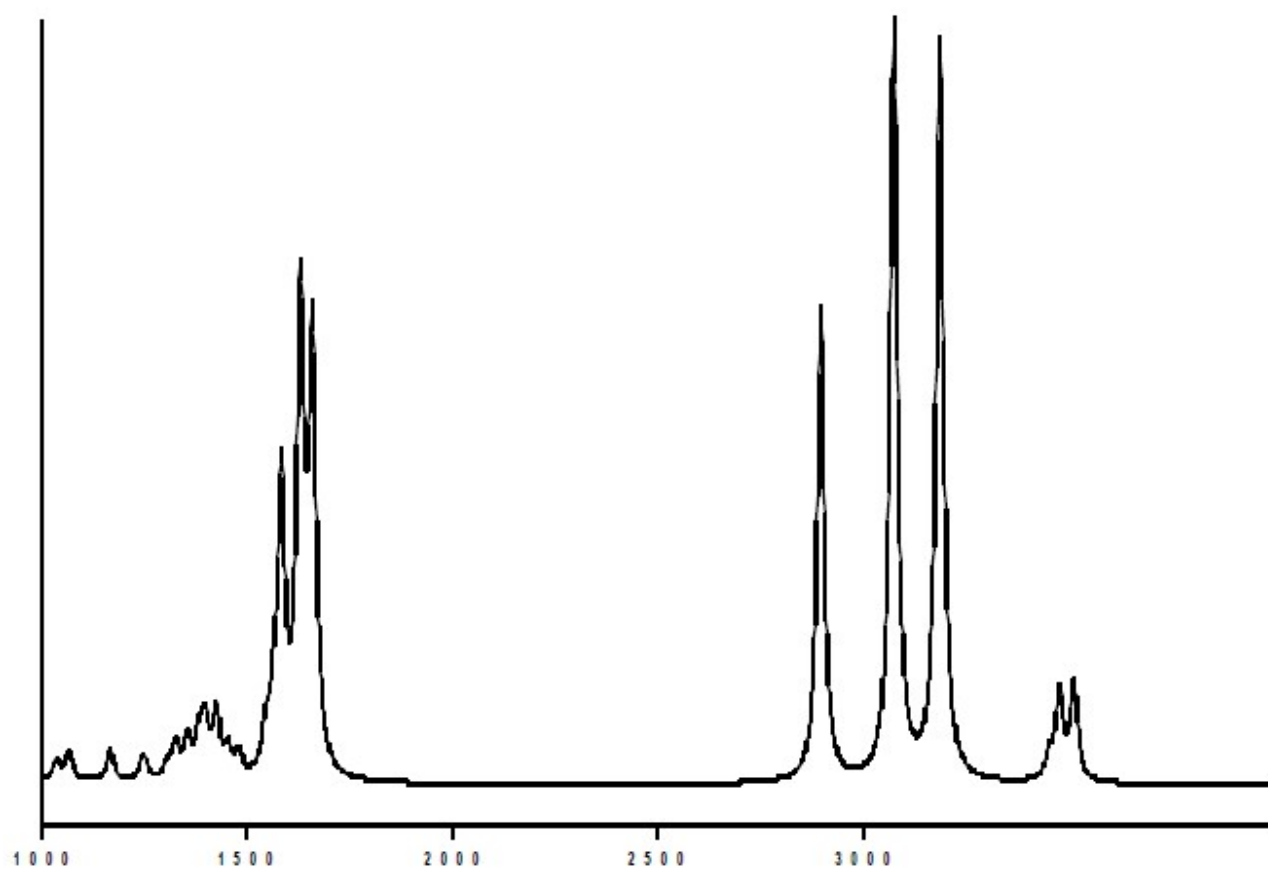

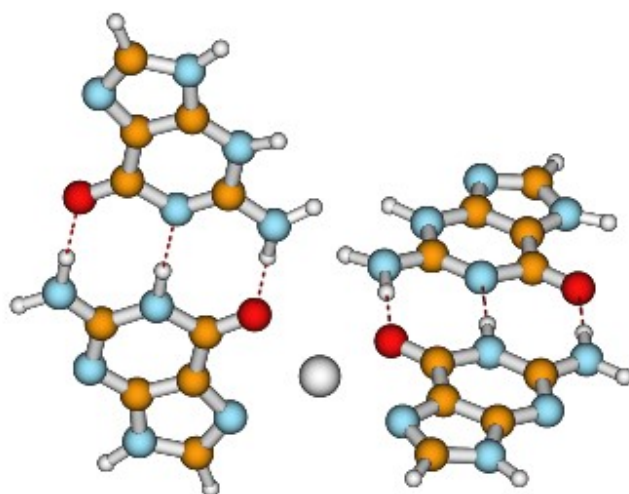

$$\Delta G = 40.1$$

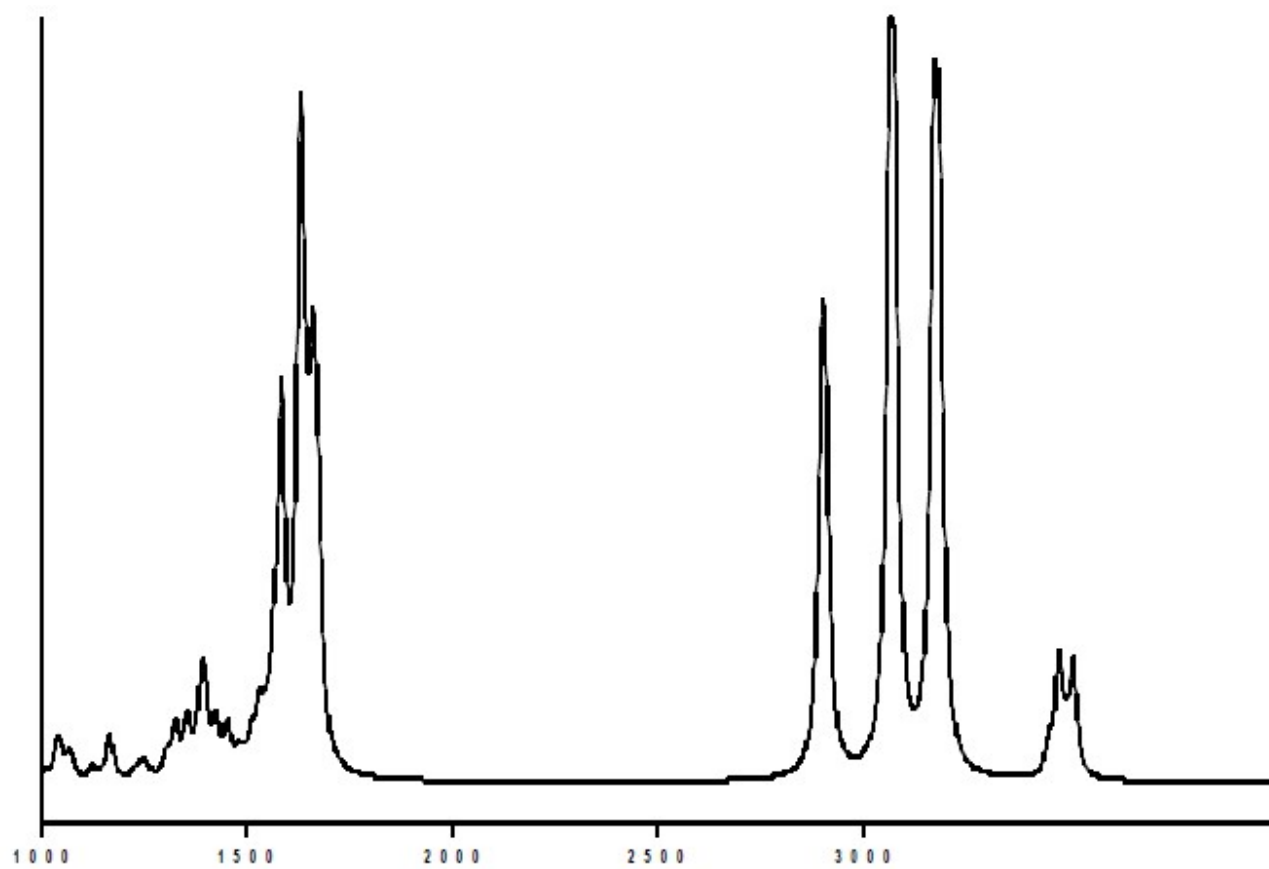

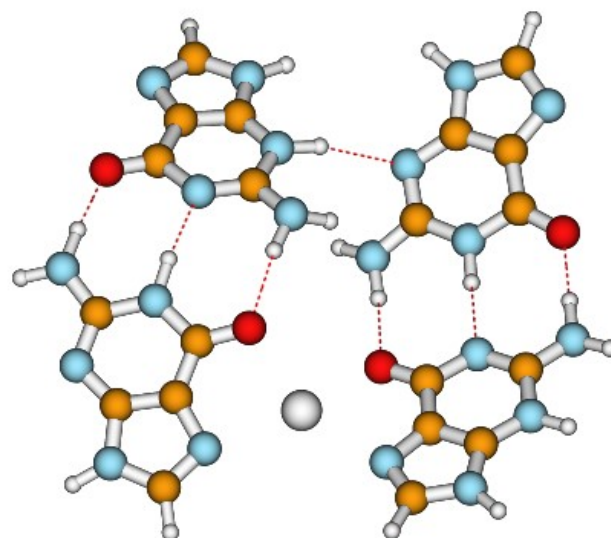

$$\Delta G = 57.8$$

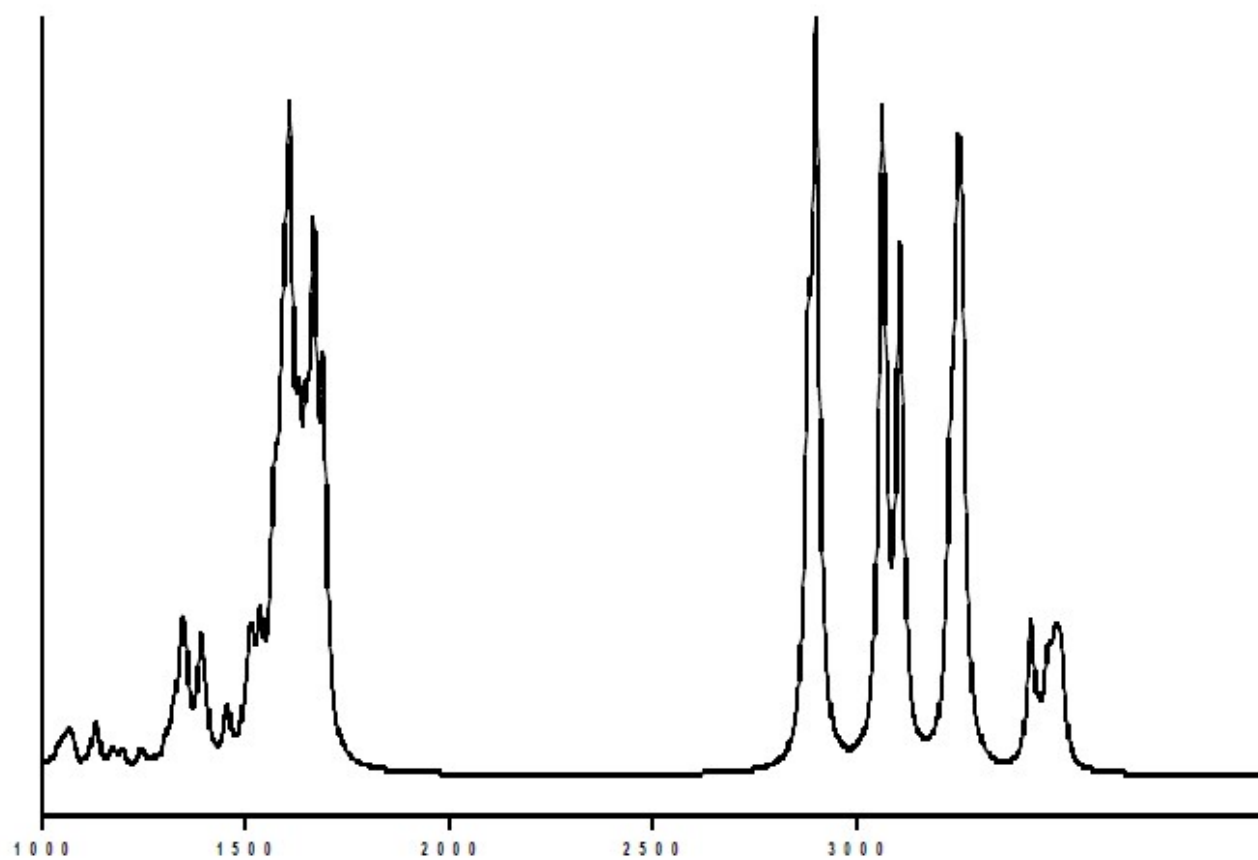



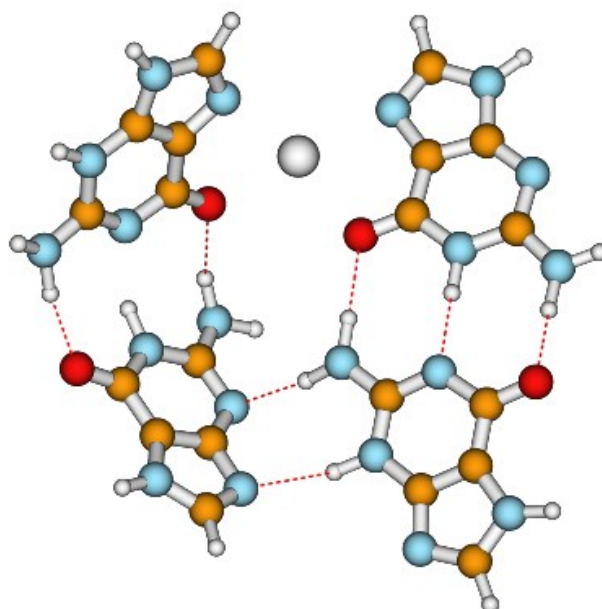

$$\Delta G = 43.7$$

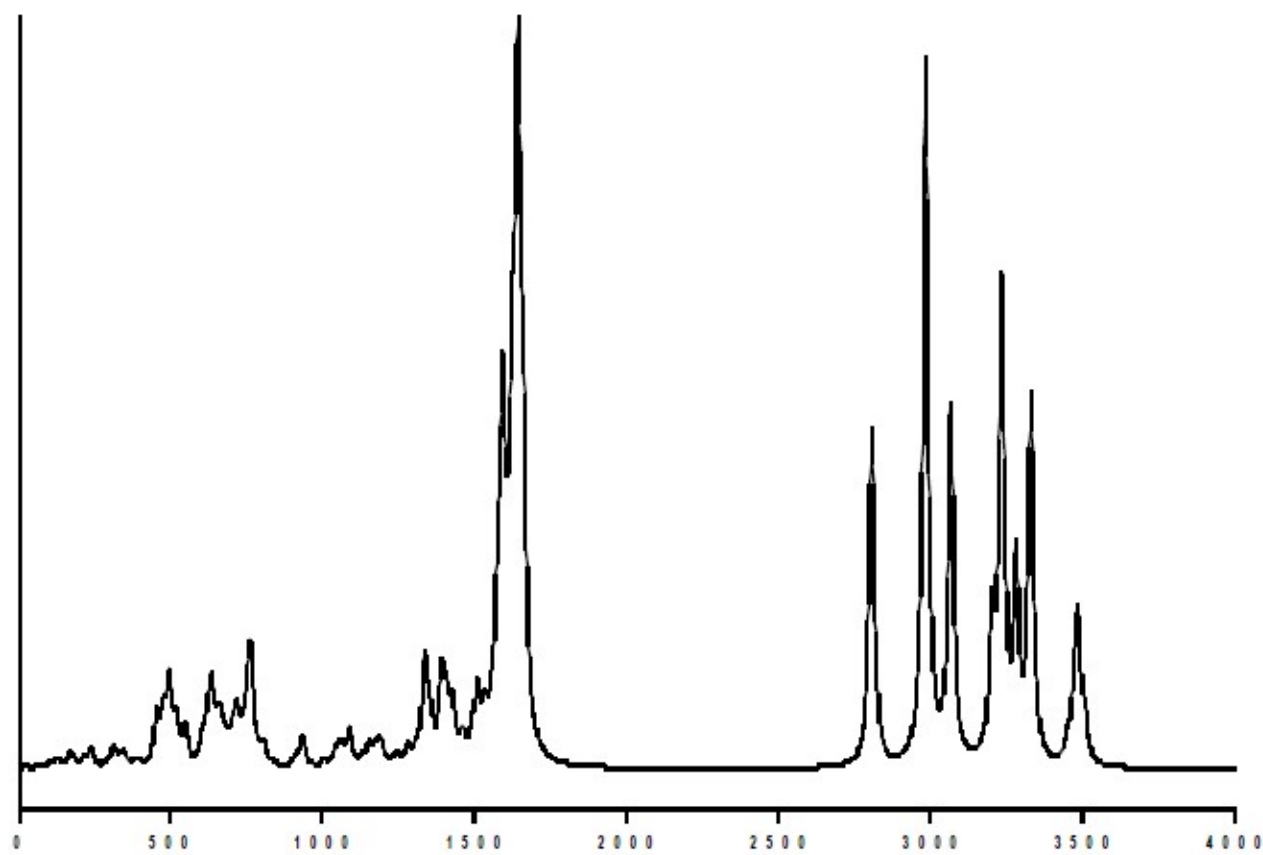

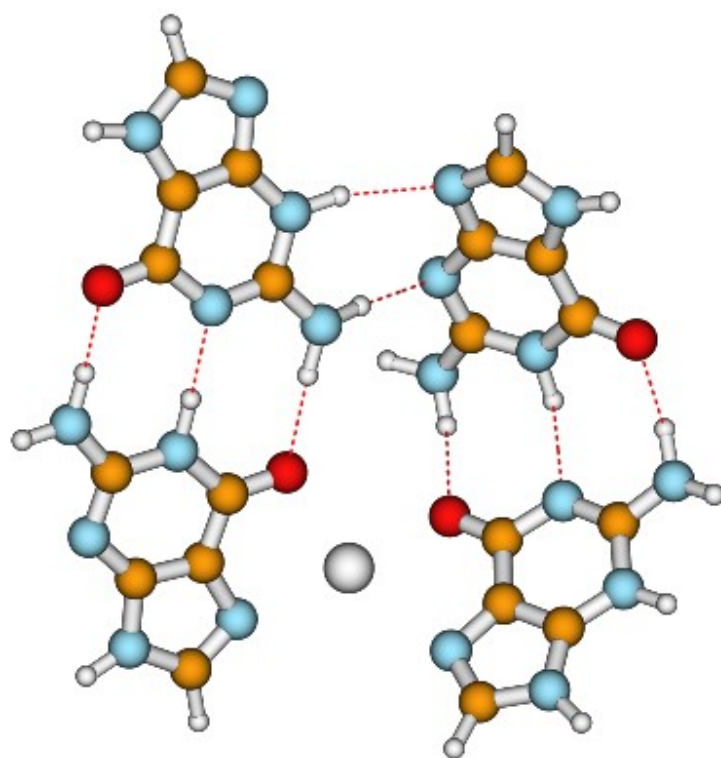

$$\Delta G = 43.5$$

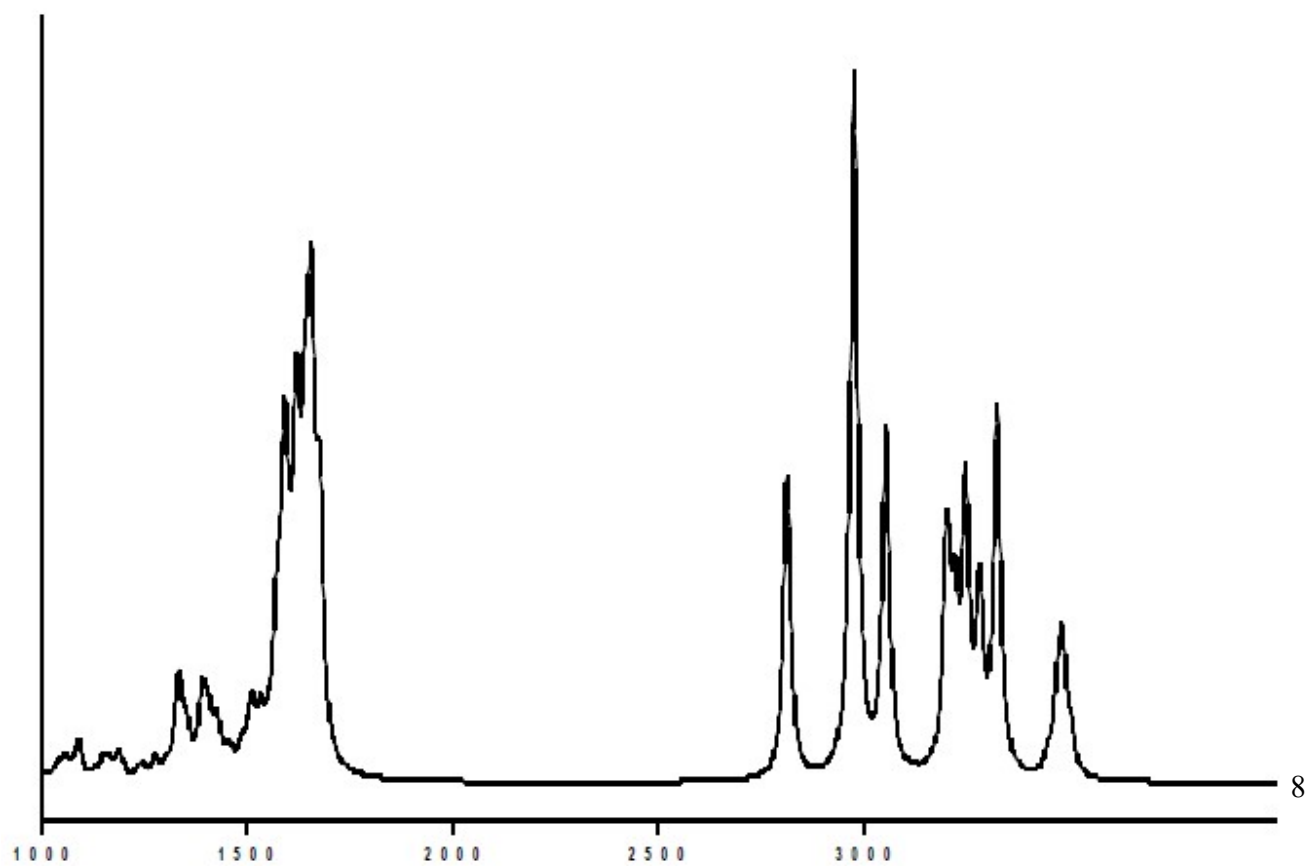

**Figure S3**

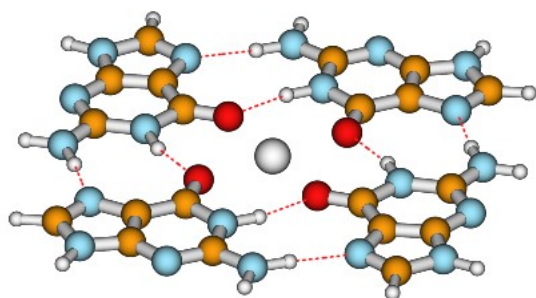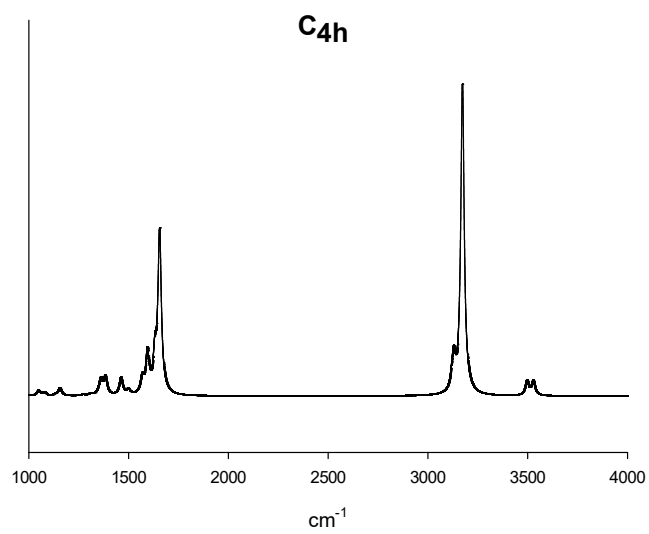

**C<sub>4h</sub> (1.2)**

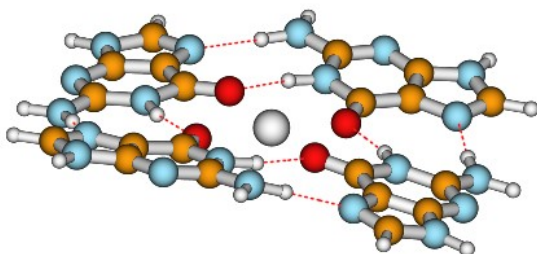

**S<sub>4</sub> (0.0)**

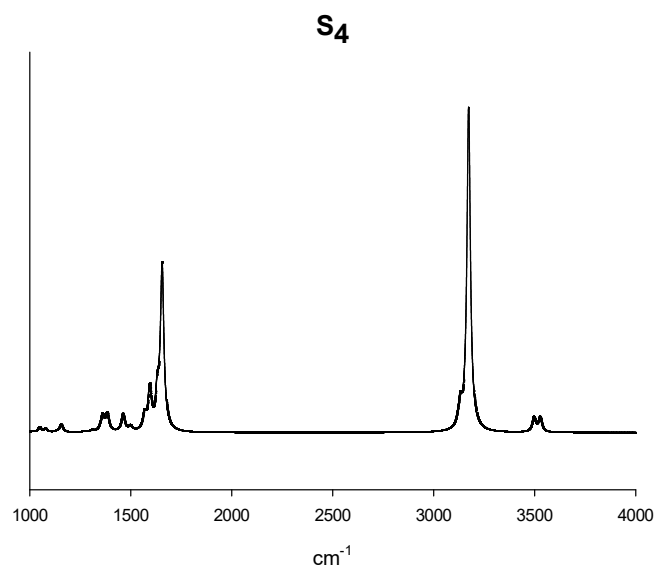

**Figure S4**

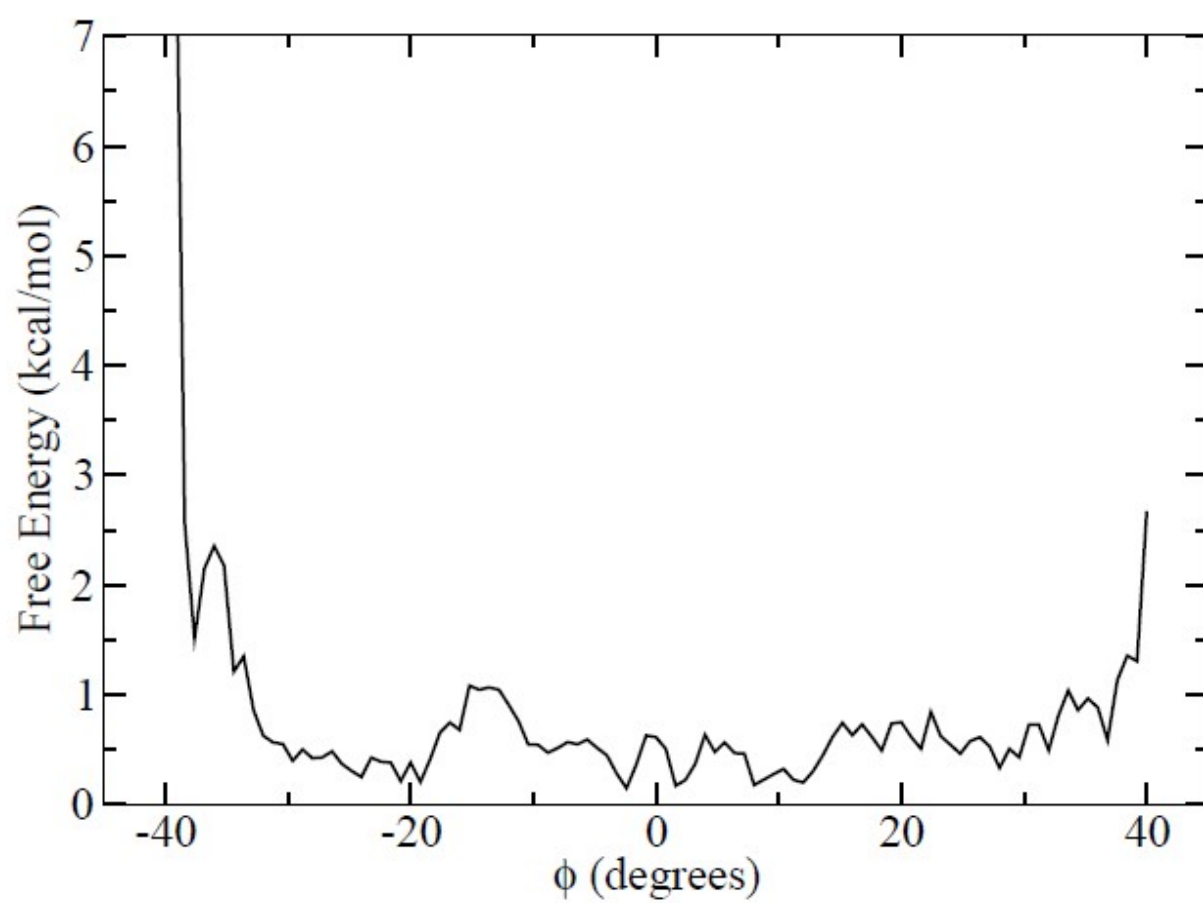

**Figure S5**

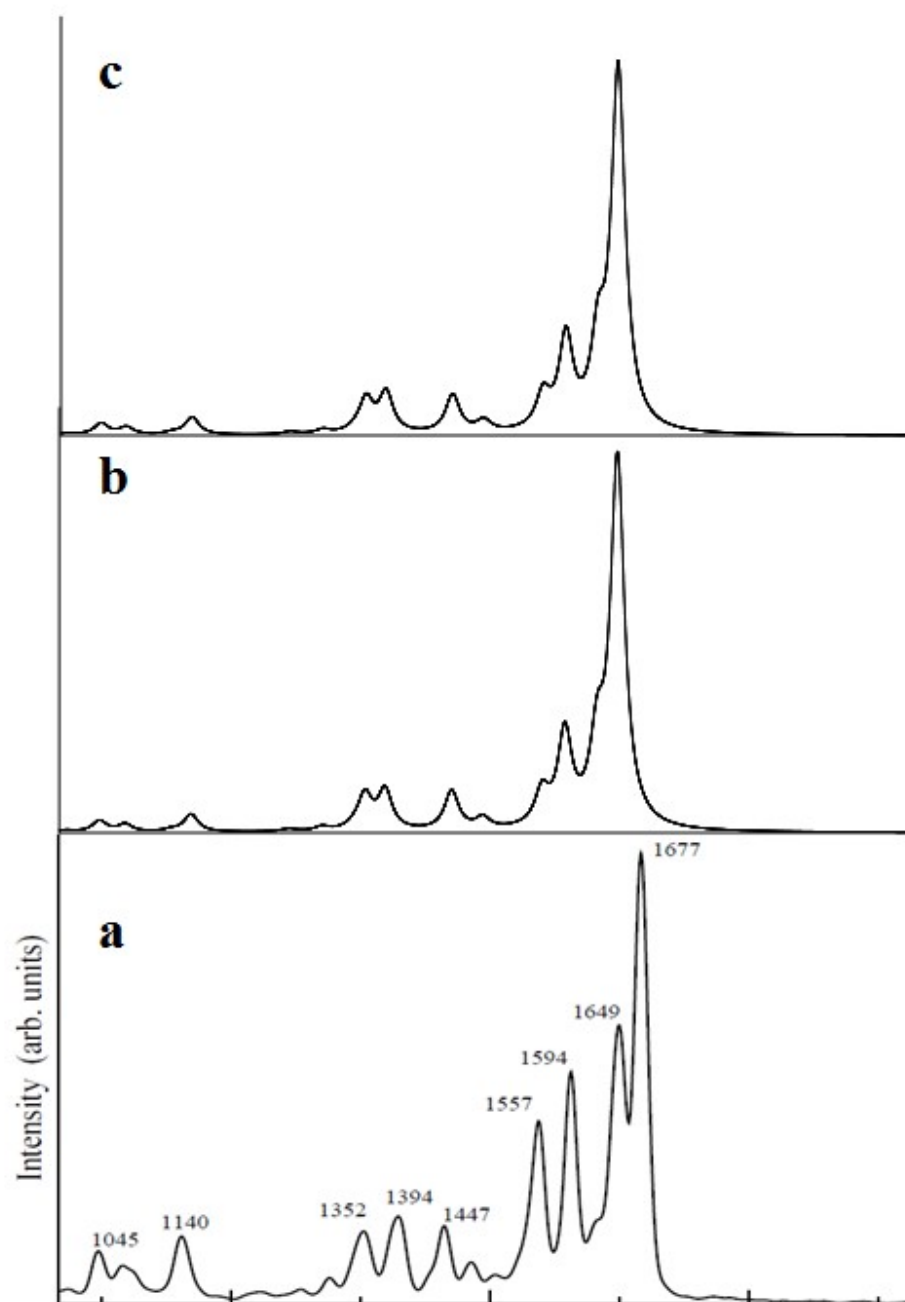

**Figure S6**

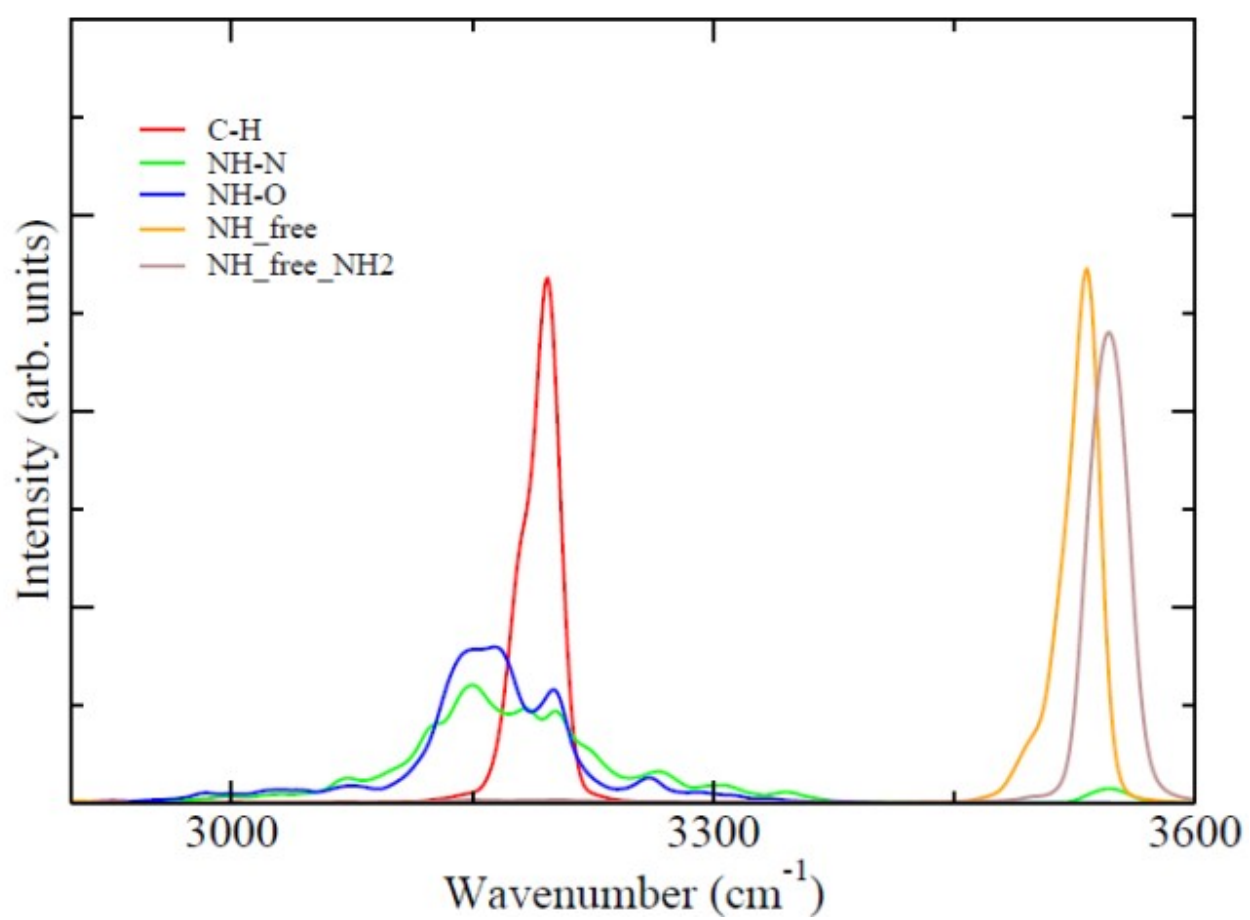

Supplement: c4cc05149a1.pdf [file c4cc05149a1.pdf]
